# Supplementary material for: Effects of Long-Term Protein Restriction on Meat Quality and Muscle Metabolites of Shaziling Pigs
Source: MDPI journal article supplement (doi:10.3390/ani12152007), 2022-08-08
Supplement: s1 [file s1]

# 中华人民共和国农业行业标准

NY/T 2826—2015

---

## 沙子岭猪

Shaziling pig

2015-10-09 发布

2015-12-01 实施

---

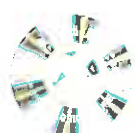

中华人民共和国农业部 发布

## 前 言

本标准按照 GB/T 1.1—2009 给出的规则起草。

本标准由农业部畜牧业司提出。

本标准由全国畜牧业标准化技术委员会(SAC/TC 274)归口。

本标准起草单位:湘潭市畜牧兽医水产局、全国畜牧总站、湖南农业大学、湘潭市家畜育种站、湘潭飞龙牧业有限公司。

本标准主要起草人:吴买生、刘彬、张彬、左晓红、薛立群、向拥军、刘伟、刘传芳、李朝晖、张善文。

# 沙子岭猪

## 1 范围

本标准规定了沙子岭猪的品种特征特性、生产性能测定及种猪出场要求等内容。  
本标准适用于沙子岭猪品种鉴别。

## 2 规范性引用文件

下列文件对于本文件的应用是必不可少的。凡是注日期的引用文件,仅注日期的版本适用于本文件。凡是不注日期的引用文件,其最新版本(包括所有的修改单)适用于本文件。

GB 16567 种畜禽调运检疫技术规范

NY/T 820 种猪登记技术规范

NY/T 821 猪肌肉品质测定技术规范

NY/T 822 种猪生产性能测定规程

## 3 产地与分布

沙子岭猪是华中两头乌猪的一个类群,原产于湖南省湘潭市。中心产区在湘潭县的云湖桥、花石、青山桥、石鼓、湘乡市的月山、白田、龙洞、韶山市的大坪、杨林、如意、雨湖区姜畲、响塘以及衡阳县的洪市、大安、曲兰和常宁市的茆田等 20 多个乡(镇)。主要分布于湖南湘潭、衡阳、永州、娄底、邵阳等市的 10 多个县(市、区)。

## 4 体型外貌

### 4.1 外貌特征

体型有大型和小型之分,现存沙子岭猪以大型为主。被毛较粗糙,毛色为“点头黑尾”,即头部毛和臀部毛为黑色,黑白交界处有“晕”,其他部位为白色,部分猪背腰部有斑花。头宽而短,嘴筒齐,面微凹,耳中等大、蝶形,基部有皱纹。背腰较平直,腹大不瘪地。腿臀欠丰满,四肢粗壮结实,后肢开张。乳头数 6 对~8 对。沙子岭猪体型外貌参见附录 A。

### 4.2 体重体尺

参照附录 B 的营养水平饲养,6 月龄公猪平均体重 42 kg,体长 90 cm,体高 45 cm;6 月龄母猪平均体重 45 kg,体长 87 cm,体高 43 cm。成年公猪平均体重 130 kg,体长 136 cm,体高 71 cm;成年母猪平均体重 145 kg,体长 138 cm,体高 66 cm。

## 5 繁殖性能

公猪性成熟期为 3 月龄,初配年龄为 5 月龄~6 月龄。母猪初情期在 3.5 月龄,适配期为 5 月龄~6 月龄。初产母猪平均总产仔数 9 头,产活仔数 8.5 头,平均初生个体重 0.8 kg,21 日龄窝重 24 kg,35 日龄断奶窝重 32 kg;经产母猪平均总产仔数 11.5 头,产活仔数 10.6 头,平均 21 日龄窝重 28 kg,35 日龄断奶窝重 45 kg。

## 6 肥育性能

参照附录 B 的营养水平饲养,15 kg~85 kg 生长肥育期间平均日增重 450 g,料重比 4.3±1。商品猪适宜屠宰体重为 75 kg~85 kg。

## 7 胴体性能

肥育猪在平均体重 85 kg 屠宰时,平均屠宰率 72%,瘦肉率 41%,眼肌面积 21 cm<sup>2</sup>,腿臀比例 25%;平均背膘厚 45 mm。

## 8 肌肉品质

肥育猪在平均体重 85 kg 屠宰时,肌肉 pH 6.1~6.4;肉色评分(5 分制)3 分~3.5 分;大理石纹评分(5 分制)3 分~3.5 分;滴水损失 1.6%;肌肉脂肪含量 3.5%。

## 9 测定方法

9.1 生长发育、胴体性能测定按照 NY/T 820、NY/T 822 的规定执行。

9.2 繁殖性能测定按照 NY/T 820 的规定执行。

9.3 肌肉品质按照 NY/T 821 的规定执行。

## 10 种猪合格评定及出场要求

10.1 体型外貌符合本品种特征。

10.2 生殖器官发育正常。有效乳头数不少于 6 对。

10.3 无遗传疾患和损征。

10.4 来源、血缘和个体标识清楚,系谱记录齐全。

10.5 按照 GB 16567 的要求检疫合格。

附录 A  
(资料性附录)  
沙子岭猪照片

A.1 沙子岭猪头部

见图 A.1。

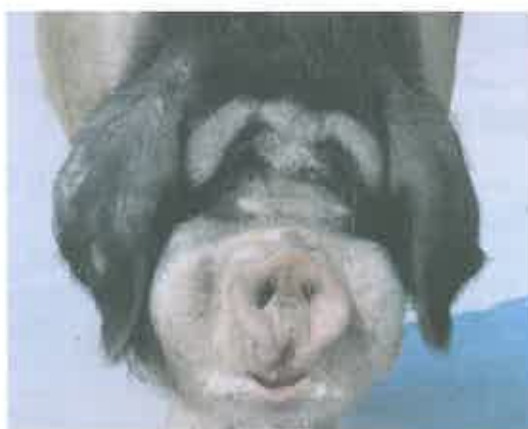

公猪

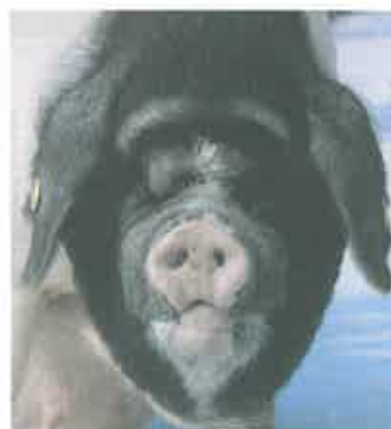

母猪

图 A.1 沙子岭猪头部

A.2 沙子岭猪侧部

见图 A.2。

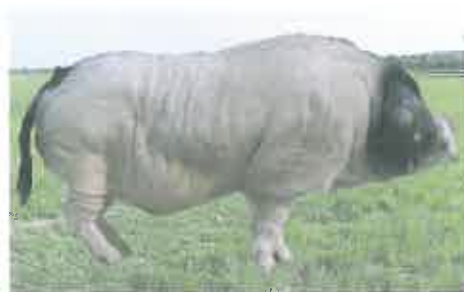

公猪

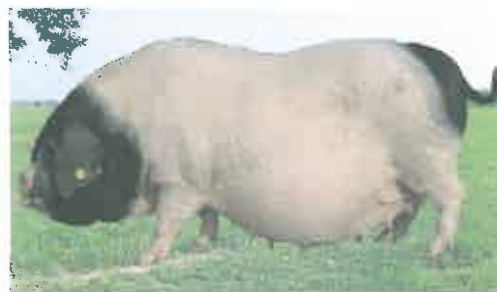

母猪

图 A.2 沙子岭猪侧部

A.3 沙子岭猪后部

见图 A.3。

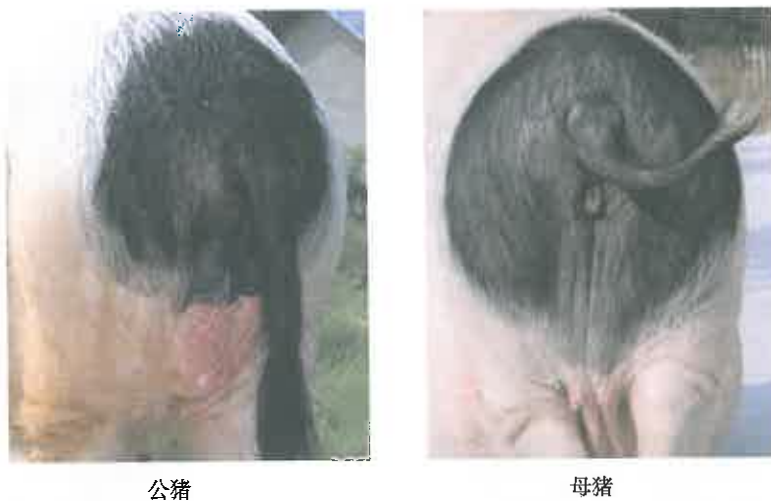

图 A.3 沙子岭猪后部

附 录 B  
(资料性附录)  
沙子岭猪营养需要

沙子岭猪营养需要见表 B.1。

表 B.1 沙子岭猪营养需要

| 类 别   | 阶段<br>kg | 消化能<br>MJ/kg | 粗蛋白<br>% | 钙<br>% | 磷<br>% | 食盐<br>% |
|-------|----------|--------------|----------|--------|--------|---------|
| 后备种猪  | 30~50    | 11.70        | 13       | 0.6    | 0.5    | 0.3     |
| 妊娠母猪  | 前期       | 11.29        | 11       | 0.61   | 0.5    | 0.32    |
|       | 后期       | 11.70        | 13       | 0.61   | 0.5    | 0.32    |
| 哺乳母猪  |          | 12.54        | 15       | 0.64   | 0.5    | 0.44    |
| 种公猪   |          | 12.54        | 15       | 0.66   | 0.5    | 0.35    |
| 仔猪    | 5~10     | 13.38        | 20       | 0.7    | 0.6    | 0.25    |
|       | 10~15    | 13.38        | 18       | 0.65   | 0.55   | 0.25    |
|       | 15~30    | 12.54        | 16       | 0.55   | 0.45   | 0.3     |
| 生长育肥猪 | 30~50    | 12.12        | 14       | 0.55   | 0.45   | 0.3     |
|       | 50 以上    | 12.70        | 12       | 0.5    | 0.4    | 0.3     |
