# Supplementary figures and images for: Effects of Long-Term Protein Restriction on Meat Quality and Muscle Metabolites of Shaziling Pigs
Source: MDPI journal article supplement (doi:10.3390/ani12152007), 2022-08-08

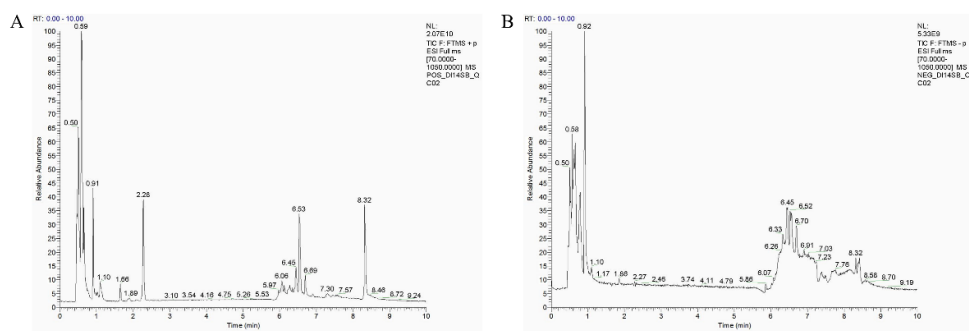

**Figure S1.** The total ion chromatogram of the QC samples in positive (**A**) and negative (**B**) ion modes.

Supplement: s1 [file s1]
